# Supplementary material for: Epidemiology of developmental dyslexia: A comparison of DSM-5 and ICD-11 criteria
Source: bioRxiv or medRxiv preprint supplement (doi:10.1101/2020.12.18.20248189), 2020-12-20
Supplement: Supplementary file [file media-1.pdf]

# Supplementary Information for : Epidemiology of developmental dyslexia: A comparison of DSM-5 and ICD-11 criteria

European Journal of Epidemiology

Cécile Di Folco<sup>1,2+</sup>, Ava Guez<sup>1+</sup>, Hugo Peyre<sup>1,3,4</sup>, Franck Ramus<sup>1\*</sup>

<sup>1</sup>Laboratoire de Sciences Cognitives et Psycholinguistique, Département d'Etudes Cognitives, Ecole Normale Supérieure, EHESS, CNRS, PSL University, 75005 Paris, France.

<sup>2</sup> AgroParisTech, Paris, France.

<sup>3</sup>INSERM UMR 1141, Paris Diderot University, Paris, France.

<sup>4</sup>Department of Child and Adolescent Psychiatry, Robert Debré Hospital, APHP, Paris, France.

+ Equal contributors.

\* Corresponding author: [franck.ramus@ens.psl.eu](mailto:franck.ramus@ens.psl.eu);

## Table of contents

|                                                                                                                                              |    |
|----------------------------------------------------------------------------------------------------------------------------------------------|----|
| Supplementary Methods.....                                                                                                                   | 3  |
| <b>Figure S1.</b> Flowchart of Included and Excluded Participants .....                                                                      | 3  |
| Table S1. Descriptive statistics for excluded and included participants. Source : MENESR DEPP, Panel 2007.....                               | 4  |
| Measures – examples of test items .....                                                                                                      | 5  |
| Reading comprehension .....                                                                                                                  | 5  |
| Phonological awareness .....                                                                                                                 | 5  |
| Mathematics .....                                                                                                                            | 5  |
| Weighted least squares .....                                                                                                                 | 6  |
| Statistical analyses .....                                                                                                                   | 6  |
| Non-response propensity weights.....                                                                                                         | 6  |
| Supplementary results .....                                                                                                                  | 7  |
| Table S2. Descriptive statistics in the working sample, computed with non-response propensity weights. Source : MENESR DEPP, Panel 2007..... | 7  |
| Table S3. Sex ratio (boys/girls) as a function of diagnostic criteria. Source : MENESR DEPP, Panel 2007. ....                                | 9  |
| Handedness and dyslexia .....                                                                                                                | 10 |
| Table S4. Prevalence of non-right-handedness as a function of diagnostic criteria. Source : MENESR DEPP, Panel 2007.....                     | 10 |

## Supplementary Methods

**Figure S1.** Flowchart of Included and Excluded Participants

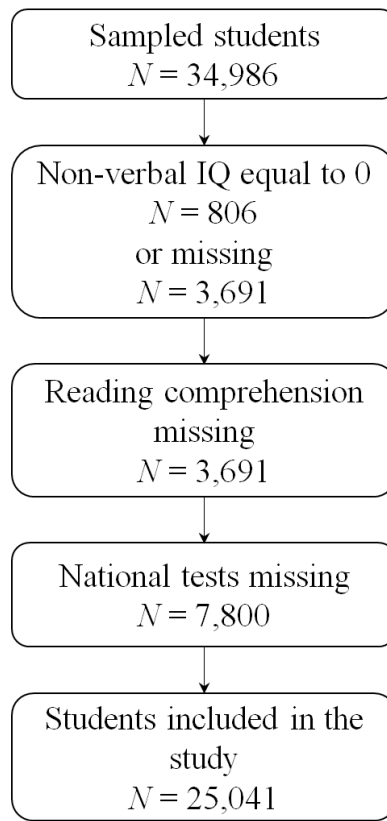

Table S1. Descriptive statistics for excluded and included participants. Source : MENESR DEPP, Panel 2007.

| Outcome variable                           | Excluded           |           | Included           |           | Difference                                 |          |
|--------------------------------------------|--------------------|-----------|--------------------|-----------|--------------------------------------------|----------|
|                                            | N=9,945            |           | N=25,041           |           | (Excluded-Included)                        |          |
|                                            | <i>M</i><br>(or %) | <i>SD</i> | <i>M</i><br>(or %) | <i>SD</i> | <i>d or</i><br><i>Odds</i><br><i>Ratio</i> | <i>p</i> |
| <i>Reading Scores</i>                      |                    |           |                    |           |                                            |          |
| Reading comprehension (15 items)           | 8.72               | 3.66      | 9.63               | 3.08      | -0.27                                      | <.0001   |
| Grammar (20 items)                         | 7.69               | 4.64      | 8.85               | 4.31      | -0.26                                      | <.0001   |
| Phonology (10 items)                       | 6.29               | 2.46      | 6.83               | 2.16      | -0.23                                      | <.0001   |
| Mathematics (48 items)                     | 23.94              | 10.02     | 26.63              | 8.77      | -0.29                                      | <.0001   |
| Intelligence score (non-verbal) (30 items) | 13.12              | 7.64      | 15.75              | 5.94      | -0.38                                      | <.0001   |
| National assessment score (out of 100)     | 51.58              | 19.78     | 60.47              | 17.11     | -0.48                                      | <.0001   |
| <i>Perceived self-efficacy</i>             |                    |           |                    |           |                                            |          |
| Self-regulation (z-score)                  | -0.05              | 1.03      | 0.04               | 0.97      | -0.09                                      | <.0001   |
| Social self-efficacy (z-score)             | -0.05              | 1.05      | 0.02               | 0.97      | -0.07                                      | <.0001   |
| Academic self-efficacy (z-score)           | -0.08              | 1.06      | 0.02               | 0.98      | -0.10                                      | <.0001   |
| <i>Motivation</i>                          |                    |           |                    |           |                                            |          |
| Intrinsic motivation (z-score)             | 0.00               | 0.93      | -0.01              | 0.92      | 0.01                                       | 0.5299   |
| Extrinsic motivation (z-score)             | 0.00               | 0.84      | -0.01              | 0.82      | 0.02                                       | 0.2618   |
| Amotivation (z-score)                      | 0.05               | 0.94      | -0.02              | 0.87      | 0.07                                       | <.0001   |
| Socio-economic index (z-score)             | -0.14              | 1.07      | 0.05               | 0.97      | -0.18                                      | <.0001   |
| Priority Education (% , OR)                | 19.9               |           | 13.4               |           | 1.61                                       | <.0001   |
| Boys (% , OR)                              | 52.9               |           | 50.4               |           | 1.11                                       | <.0001   |
| Left-handed (% , OR)                       | 11.0               |           | 11.8               |           | 0.99                                       | 0.7404   |
| Repeater (% , OR)                          | 25.5               |           | 15.7               |           | 4.52                                       | <.0001   |

Measures – examples of test items

Reading comprehension

Example: D'après le texte, combien de garçons escaladent le mur ?...

(According to the text, how many boys are climbing on the wall?....)

Phonological awareness

Example: fer, aimer, verre, amer, hiver ( $\text{\fɛʁ}$ ,  $\text{\e.me}$ ,  $\text{\vɛʁ}$ ,  $\text{\a.mɛʁ}$ ,  $\text{\i.vɛʁ}$ )

*Grammar*

Example: « Septembre ! C'est le mois.....choisit l'hirondelle pour partir vers le sud du Sahara.....elle peut passer l'hiver au chaud ». Correct answers : « que », « où ».

(“September! This is the month.....the swallow chooses to fly towards the South of Sahara....it can spend its winter warm”). Correct answers: “that”, “where”.

Mathematics

Examples:

-  $27 \times 20 = \dots$

- Zoé est plus petite que Joëlle, et elle est plus grande que Cécile. La fille la plus grande s'appelle : 1) Cécile 2) Zoé 3) Joëlle (Zoé is shorter than Joëlle, and she is taller than Cécile. The tallest girl is called: 1) Cécile 2) Zoé 3) Joëlle)

## Weighted least squares

For the ICD-11 definition, we estimated the variance of the residuals of reading comprehension on non-verbal intelligence score as a function of non-verbal intelligence scores. We first regressed the squared residuals of the OLS regression on intelligence score. The fitted values from this regression constitute our estimate of residual variance. We then ran weighted least squares using the inverse of this estimate as weights in order to produce efficient regression parameters.

## Statistical analyses

### Non-response propensity weights

In order to account for differences in the likelihood to respond to the survey, we computed non-response propensity weights, which we combined with the initial weights from the exhaustive baseline survey. Non-response propensity scores were first computed with a logistic regression, and inverted in order to obtain the non-response propensity weights. Both the baseline weights and the non-response propensity weights were then scaled; the product of these two scaled weights constitutes our final weights. The R code can be found below:

## Supplementary results

Table S2. Descriptive statistics in the working sample, computed with non-response propensity weights. Source : MENESR DEPP, Panel 2007.

| <b>Variables</b>                  | <b>N</b> | <b>Mean or %</b> | <b>SD</b> | <b>Min</b> | <b>Max</b> |
|-----------------------------------|----------|------------------|-----------|------------|------------|
| <i>Reading Scores</i>             |          |                  |           |            |            |
| Reading comprehension             | 25041    | 9.47             | 3.12      | 0.00       | 15.00      |
| Grammar                           | 25041    | 8.61             | 4.32      | 9.00       | 20.00      |
| Phonology                         | 25041    | 6.74             | 2.19      | 0.00       | 10.00      |
| Mathematics                       | 25041    | 25.98            | 8.82      | 0.00       | 48.00      |
| National assessment average score | 25041    | 59.33            | 17.35     | 0.00       | 98.50      |
| Intelligence score (non-verbal)   | 25041    | 100.00           | 15.00     | 62.80      | 136.41     |
| <i>Perceived self-efficacy</i>    |          |                  |           |            |            |
| Self-regulation                   | 23826    | 0.01             | 0.99      | -2.24      | 0.88       |
| Social self-efficacy              | 22644    | 0.00             | 0.99      | -6.11      | 1.66       |
| Academic self-efficacy            | 21709    | 0.00             | 0.99      | -5.30      | 2.12       |
| <i>Motivation</i>                 |          |                  |           |            |            |
| Intrinsic motivation              | 23291    | -0.01            | 0.92      | -3.02      | 1.38       |
| Extrinsic motivation              | 23291    | -0.01            | 0.83      | -2.14      | 1.72       |

|                        |       |      |      |       |      |
|------------------------|-------|------|------|-------|------|
| Amotivation            | 23291 | 0.00 | 0.88 | -0.79 | 4.43 |
| Socio-economic index   | 23536 | 0.00 | 1.00 | -5.92 | 4.31 |
| <hr/>                  |       |      |      |       |      |
| Priority Education (%) | 25041 | 15.6 |      |       |      |
| Boys (%)               | 25041 | 51.0 |      |       |      |
| Left-handed (%)        | 23727 | 11.9 |      |       |      |
| Repeater (%)           | 25041 | 17.1 |      |       |      |
| <hr/>                  |       |      |      |       |      |



Table S3. Sex ratio (boys/girls) as a function of diagnostic criteria. Source : MENESR DEPP, Panel 2007.

| Severity<br>threshold | Entire<br>popu-<br>lation | Reading<br><<br>threshold | Reading < threshold + one exclusion criterion |                         |                           |       | Reading<br><<br>threshold<br>+ all<br>exclusion<br>criteria | Reading <<br>threshold +<br>Academic<br>achievement<br>< -0.5 SD | All<br>preceding<br>criteria<br>(DSM-5) | All<br>preceding<br>criteria +<br>reading-IQ<br>discrepanc<br>y (ICD-11) |
|-----------------------|---------------------------|---------------------------|-----------------------------------------------|-------------------------|---------------------------|-------|-------------------------------------------------------------|------------------------------------------------------------------|-----------------------------------------|--------------------------------------------------------------------------|
|                       |                           |                           | Serious<br>illness                            | Language<br>proficiency | Psychosocial<br>adversity | IQ<70 |                                                             |                                                                  |                                         |                                                                          |
| -1 SD                 | 1.04                      | 1.47                      | 1.46                                          | 1.47                    | 1.47                      | 1.42  | 1.41                                                        | 1.49                                                             | 1.41                                    | 1.53                                                                     |
| -1.25 SD              |                           | 1.58                      | 1.54                                          | 1.57                    | 1.56                      | 1.51  | 1.5                                                         | 1.68                                                             | 1.51                                    | 1.57                                                                     |
| <b>-1.5 SD</b>        |                           | 1.61                      | 1.61                                          | 1.61                    | 1.61                      | 1.54  | 1.54                                                        | 1.65                                                             | 1.58                                    | 1.83                                                                     |
| -1.75 SD              |                           | 1.76                      | 1.75                                          | 1.78                    | 1.77                      | 1.69  | 1.7                                                         | 1.78                                                             | 1.73                                    | 2.11                                                                     |
| -2 SD                 |                           | 1.76                      | 1.75                                          | 1.78                    | 1.77                      | 1.69  | 1.7                                                         | 1.78                                                             | 1.73                                    | 2.22                                                                     |

Handedness and dyslexia

Table S4. Prevalence of non-right-handedness as a function of diagnostic criteria. Source : MENESR DEPP, Panel 2007.

| Severity<br>threshold | Entire<br>popu-<br>lation | Reading<br><<br>threshold | Reading < threshold + one exclusion<br>criterion |                         |                           |       | Reading<br><<br>threshold<br>+ all<br>exclusion<br>criteria | Reading <<br>threshold +<br>Academic<br>achievement<br>< -0.5 SD | All<br>preceding<br>criteria<br>(DSM-5) | All<br>preceding<br>criteria +<br>reading-IQ<br>discrepancy<br>(ICD-11) |
|-----------------------|---------------------------|---------------------------|--------------------------------------------------|-------------------------|---------------------------|-------|-------------------------------------------------------------|------------------------------------------------------------------|-----------------------------------------|-------------------------------------------------------------------------|
|                       |                           |                           | Serious<br>illness                               | Language<br>proficiency | Psychosocial<br>adversity | IQ<70 |                                                             |                                                                  |                                         |                                                                         |
| -1 SD                 | 13,8                      | 15,0 <sup>a</sup>         | 15,0                                             | 15,3                    | 15,0                      | 15,1  | 15,3                                                        | 15,0                                                             | 15,3                                    | 15.2 n.s.                                                               |
| -1.25 SD              |                           | 15,2                      | 15,3                                             | 15,5                    | 15,3                      | 15,2  | 15,6                                                        | 15.0 n.s.                                                        | 15,4                                    | 15.4 n.s.                                                               |
| <b>-1.5 SD</b>        |                           | 15,7                      | 15,8                                             | 16,0                    | 15,8                      | 15,9  | 16,5                                                        | 15,5                                                             | 16,4                                    | 14.9 n.s.                                                               |
| -1.75 SD              |                           | 16,5                      | 16,7                                             | 17,0                    | 16,6                      | 16,8  | 17,9                                                        | 15.4 n.s.                                                        | 16,7                                    | 14.7 n.s.                                                               |
| -2 SD                 |                           | 16,5                      | 16,7                                             | 17,0                    | 16,6                      | 16,8  | 17,9                                                        | 15.3 n.s.                                                        | 16,7                                    | 13.4 n.s.                                                               |

<sup>a</sup> All prevalence rates in columns 2-10 are significantly different from that in the entire population (Column 1) at  $p < 0.05$ , except where indicated as n.s..

Logistic regression with dyslexia as dependent variable and non-righthandedness, sex and IQ as independent variables:

With DSM-5 definition:

|                   | Estimate | Std. Error | z value | Pr(> z ) |
|-------------------|----------|------------|---------|----------|
| (Intercept)       | 2,924    | 0,304      | 9,631   | 0,000    |
| sex               | -0,879   | 0,387      | -2,273  | 0,023    |
| IQ                | -0,062   | 0,003      | -18,745 | 0,000    |
| handedness        | 0,539    | 0,775      | 0,695   | 0,487    |
| sex:IQ            | 0,014    | 0,004      | 3,308   | 0,001    |
| sex:handedness    | 0,148    | 0,998      | 0,149   | 0,882    |
| IQ:handedness     | -0,002   | 0,009      | -0,219  | 0,827    |
| sex:IQ:handedness | -0,007   | 0,011      | -0,596  | 0,551    |

With ICD-11 definition:

|                   | Estimate | Std. Error | z value | Pr(> z ) |
|-------------------|----------|------------|---------|----------|
| (Intercept)       | -0.62    | 0.43       | -1.46   | 0.14     |
| sex               | -0.47    | 0.53       | -0.88   | 0.38     |
| IQ                | -0.03    | <0.01      | -7.25   | <0.01    |
| handedness        | 0.42     | 1.07       | 0.39    | 0.7      |
| sex:IQ            | 0.01     | 0.01       | 1.98    | 0.05     |
| sex:handedness    | -0.25    | 1.39       | -0.18   | 0.86     |
| IQ:handedness     | <0.01    | 0.01       | -0.08   | 0.94     |
| sex:IQ:handedness | <0.01    | 0.01       | -0.27   | 0.79     |
